# Supplementary material
Source: publisher figshare collection journal article supplement (https://acs.figshare.com/ndownloader/files/28102249)
Supplement: Supplementary file 1 [file 28102249]

Supporting Information: Generalizing the Chiral Self-Assembly of  
Spheres and Tetrahedra to Non-Spherical and Polydisperse Molecules in

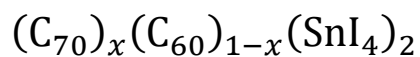

Daniel B. Straus\* and Robert J. Cava\*

Department of Chemistry, Princeton University, Princeton, NJ 08544 USA

\*Authors to whom correspondence should be addressed. Email: [dstraus@princeton.edu](mailto:dstraus@princeton.edu),  
[rcava@princeton.edu](mailto:rcava@princeton.edu)

## Experimental

### 1. Synthesis

$C_{70}(SnI_4)_2$  was synthesized by dissolving 50.15 mg  $C_{70}$  (99%, Proactive Molecular Research) and 2506.86 mg  $SnI_4$  (95%, Alfa-Aesar) in a mixture of 50 mL toluene (ACS, Sigma-Aldrich) and 60 mL 1,2-dichlorobenzene (99%, Acros Organics) using sonication. 25 mL of benzene followed by ~400 mL pentane (98%, Sigma-Aldrich) were layered on top of the dichlorobenzene-toluene solution and left undisturbed so the solution would mix. Two phases of crystals grew: dull black hexagonally shaped crystals of  $C_{70}(SnI_4)_2$  as well as shiny black rectangular crystals of another phase that we hypothesize is a  $C_{70}$ -pentane intercalation compound.

$(C_{70})_{0.75}(C_{60})_{0.25}(SnI_4)_2$  was synthesized by dissolving 2.57 mg  $C_{60}$  (99.5%, Proactive Molecular Research), 8.80 mg  $C_{70}$ , and 504.0 mg  $SnI_4$  in a mixture of 10 mL toluene and 10 mL 1,2-dichlorobenzene using sonication. ~90 mL pentane was layered on top, and the solution was placed in a 4 °C refrigerator and left undisturbed while the solutions mixed. Dull black crystals of  $(C_{70})_{0.75}(C_{60})_{0.25}(SnI_4)_2$  were the only phase that formed.

$(C_{70})_{0.5}(C_{60})_{0.5}(SnI_4)_2$  was synthesized by dissolving 5.12 mg  $C_{60}$ , 6.11 mg  $C_{70}$ , and 503.1 mg  $SnI_4$  in a mixture of 10 mL toluene and 10 mL 1,2-dichlorobenzene using sonication. ~90 mL pentane was layered on top, and the solution was placed in a 4 °C refrigerator and left undisturbed while the solutions mixed. Dull black crystals of  $(C_{70})_{0.5}(C_{60})_{0.5}(SnI_4)_2$  were the only phase that formed.

$(C_{70})_{0.25}(C_{60})_{0.75}(SnI_4)_2$  was synthesized by dissolving 7.47 mg  $C_{60}$ , 2.93 mg  $C_{70}$ , and 504.0 mg  $SnI_4$  in a mixture of 16 mL toluene and 8 mL 1,2-dichlorobenzene using sonication. ~85 mL pentane was layered on top, and the solution was placed in a 4 °C refrigerator and left

undisturbed while the solutions mixed. Dull black crystals of  $(C_{70})_{0.25}(C_{60})_{0.75}(SnI_4)_2$  were the only phase that formed.

## 2. Characterization

Powder X-ray diffraction patterns were collected on a Bruker D8 Advance Eco diffractometer using Cu  $k\alpha$  radiation ( $\lambda = 1.5406 \text{ \AA}$ ). To prepare the powder, several crystals of  $(C_{70})_x(C_{60})_{1-x}(SnI_4)_2$  were placed on a Bruker miscut Si low background slide and crushed. Lattice parameters were extracted using Le Bail refinements performed with TOPAS.<sup>1</sup>

Single crystal X-ray diffraction data were collected on a Bruker APEX-II Duo CCD diffractometer or a Bruker D8 Venture diffractometer with a Photon III detector, both using Mo  $k\alpha$  ( $\lambda = 0.7107 \text{ \AA}$ ) radiation. Crystals were mounted with Parabar 10312 oil (Hampton Scientific) on Kapton loops (MiTiGen). The data are integrated using SAINT (Bruker AXS) and scaled with a multiscan absorption correction using SADABS (Bruker AXS). The  $P4_332$  (#212) or  $P4_132$  (#213) space groups were identified through systematic absences using XPREP (Bruker AXS). The initial solution was found using the intrinsic phasing method of the SHELXT program<sup>2</sup> and the structure was refined using the least squares algorithm of the SHELXL program<sup>3</sup> in the OLEX2 GUI.<sup>4</sup> The absolute configuration (handedness) of the crystal was resolved using the anomalous dispersion of X-rays, and the correct enantiomer was identified by a Flack parameter of approximately zero.<sup>5</sup>

To refine the single crystal structure for  $C_{70}(SnI_4)_2$ , a  $C_{70}$  molecule was imported from ref 6 (ICSD collection code 75506) using the *importfrag* command in OLEX2 and refined as a rigid body. The coordinates of the C atoms were restrained using an AFIX 9 instruction in SHELXL, which allows the  $C_{70}$  molecule to uniformly grow or shrink but fixes the relative position of the C atoms. The occupancy of each C atom was fixed at 1/6 to account for disorder about symmetry

elements. Anisotropic thermal parameters were used for the Sn and I atoms. The C atoms were refined isotropically. Every C atom is restrained to have identical thermal parameters using the EADP instruction in SHELXL.

The single crystal structures of  $(C_{70})_x(C_{60})_{1-x}(SnI_4)_2$  ( $x = 0.25, 0.5, 0.75$ ) were refined similarly to that of  $C_{70}(SnI_4)_2$ . The  $C_{70}$  molecule was refined as a rigid body using the AFIX 9 instruction, with the occupancy of each C atom in  $C_{70}$  set to  $x/6$  to account for disorder about symmetry elements where  $x$  is the nominal fraction of  $C_{70}$  (for instance, the occupancy is set to  $1/24$  for  $x = 0.25$ ). To account for the presence of  $C_{60}$ , the structure of the  $C_{60}$  molecule was taken from the Idealized Molecular Geometry Library.<sup>7</sup> The thermal parameters of each C atom in  $C_{70}$  were restrained to be identical to one another using the EADP instruction. Like  $C_{70}$ , the  $C_{60}$  molecule was refined as a rigid body using the AFIX 9 instruction. The occupancy of each C atom in  $C_{60}$  was fixed as  $(1 - x)/6$  to account for disorder about symmetry elements (for instance, the occupancy is set to  $3/24$  for  $x = 0.25$ ). The thermal parameters of each C atom in  $C_{60}$  were restrained to be identical to one another using the EADP instruction. In the  $x = 0.25$  and  $x = .5$  structures, one of the two symmetry distinct I atoms resolved with disorder, and the occupancies of the two sites were constrained to sum to unity.

Crystal structure images are visualized using VESTA.<sup>8</sup> Asymmetric units in Figures S2-S5 are visualized using OLEX2.<sup>4</sup>

## Additional Figures

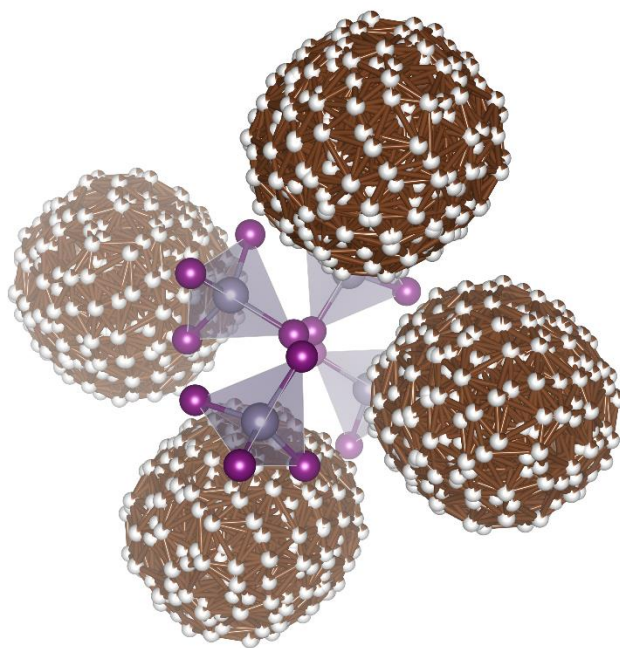

**Figure S1:** Depiction of 4<sub>1</sub> screw axis in C<sub>70</sub>(SnI<sub>4</sub>)<sub>2</sub> with disordered C<sub>70</sub> molecules shown.

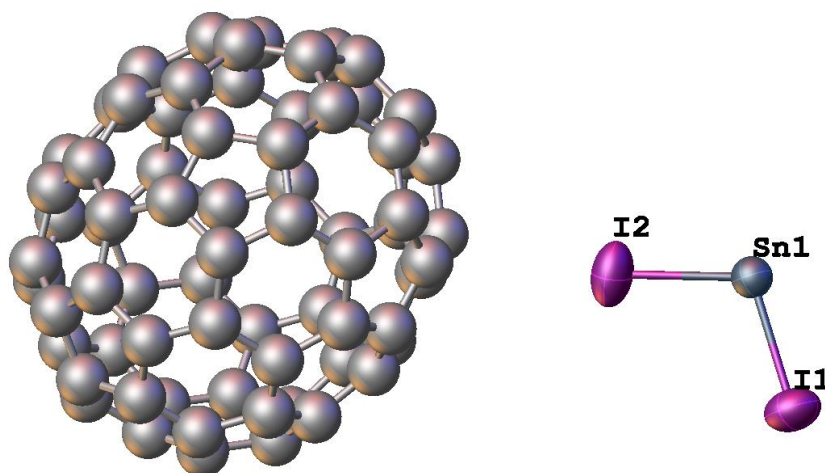

**Figure S2:** Asymmetric unit for single crystal structure of C<sub>70</sub>(SnI<sub>4</sub>)<sub>2</sub>. Atoms are represented as 50% probability thermal displacement parameters.

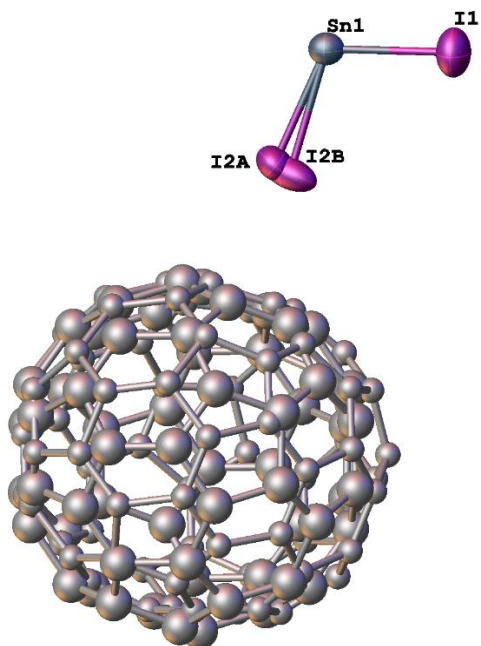

**Figure S3:** Asymmetric unit for single crystal structure of  $(C_{70})_{0.25}(C_{60})_{0.75}(SnI_4)_2$ . Atoms are represented as 50% probability thermal displacement parameters.

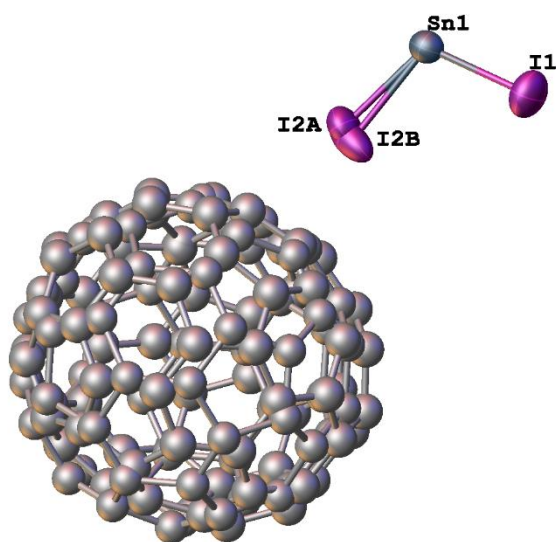

**Figure S4:** Asymmetric unit for single crystal structure of  $(C_{70})_{0.5}(C_{60})_{0.5}(SnI_4)_2$ . Atoms are represented as 50% probability thermal displacement parameters.

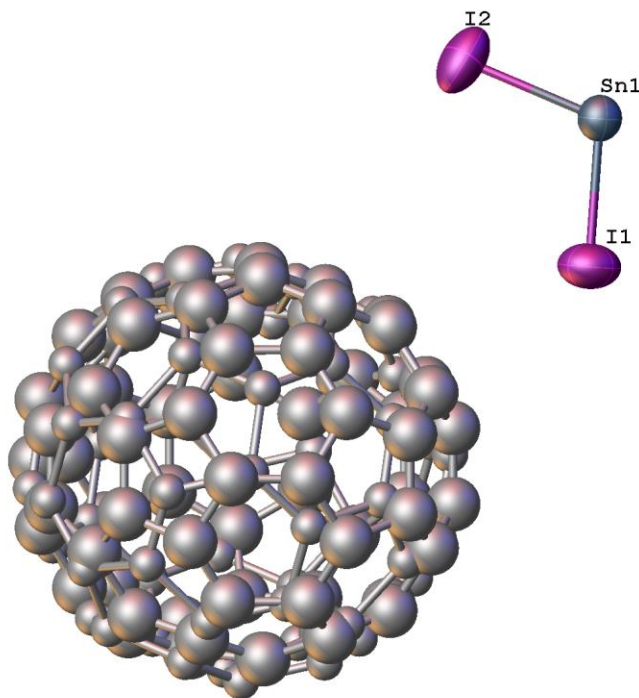

**Figure S5:** Asymmetric unit for single crystal structure of  $(\text{C}_{70})_{0.75}(\text{C}_{60})_{0.25}(\text{SnI}_4)_2$ . Atoms are represented as 50% probability thermal displacement parameters.

## Additional Tables

**Table S1: Crystal data and structure refinement for  $C_{70}(SnI_4)_2$ .**

|                                               |                                                                  |
|-----------------------------------------------|------------------------------------------------------------------|
| Empirical formula                             | $C_{70}I_8Sn_2$                                                  |
| Formula weight                                | 2093.31                                                          |
| Temperature/K                                 | 294.99                                                           |
| Crystal system                                | cubic                                                            |
| Space group                                   | $P4_132$                                                         |
| $a/\text{\AA}$                                | 17.1493(7)                                                       |
| Volume/ $\text{\AA}^3$                        | 5043.6(6)                                                        |
| Z                                             | 4                                                                |
| $\rho_{\text{calc}}/\text{g/cm}^3$            | 2.757                                                            |
| $\mu/\text{mm}^{-1}$                          | 5.937                                                            |
| $F(000)$                                      | 3776.0                                                           |
| Crystal size/ $\text{mm}^3$                   | $0.568 \times 0.536 \times 0.284$                                |
| Radiation                                     | $\text{MoK}\alpha$ ( $\lambda = 0.71073$ )                       |
| $2\Theta$ range for data collection/ $^\circ$ | 4.114 to 57.396                                                  |
| Index ranges                                  | $-21 \leq h \leq 12, -23 \leq k \leq 22, -23 \leq l \leq 11$     |
| Reflections collected                         | 20622                                                            |
| Independent reflections                       | 2189 [ $R_{\text{int}} = 0.0310$ , $R_{\text{sigma}} = 0.0158$ ] |
| Data/restraints/parameters                    | 2189/0/24                                                        |
| Goodness-of-fit on $F^2$                      | 1.066                                                            |
| Final R indexes [ $I \geq 2\sigma(I)$ ]       | $R_1 = 0.0679$ , $wR_2 = 0.1910$                                 |
| Final R indexes [all data]                    | $R_1 = 0.0911$ , $wR_2 = 0.2144$                                 |
| Largest diff. peak/hole / $e \text{\AA}^{-3}$ | 0.93/-0.72                                                       |
| Flack parameter                               | -0.04(3)                                                         |



**Table S2: Crystal data and structure refinement for  $(\text{C}_{70})_{0.25}(\text{C}_{60})_{0.75}(\text{SnI}_4)_2$ .**

|                                               |                                                               |
|-----------------------------------------------|---------------------------------------------------------------|
| Empirical formula                             | $\text{C}_{62.5}\text{I}_8\text{Sn}_2$                        |
| Formula weight                                | 2003.23                                                       |
| Temperature/K                                 | 295                                                           |
| Crystal system                                | cubic                                                         |
| Space group                                   | $\text{P4}_3\text{32}$                                        |
| $a/\text{\AA}$                                | 16.7390(13)                                                   |
| Volume/ $\text{\AA}^3$                        | 4690.2(11)                                                    |
| Z                                             | 4                                                             |
| $\rho_{\text{calc}}/\text{g/cm}^3$            | 2.837                                                         |
| $\mu/\text{mm}^{-1}$                          | 6.377                                                         |
| F(000)                                        | 3596.0                                                        |
| Crystal size/ $\text{mm}^3$                   | $0.467 \times 0.308 \times 0.266$                             |
| Radiation                                     | $\text{MoK}\alpha$ ( $\lambda = 0.71073$ )                    |
| $2\theta$ range for data collection/ $^\circ$ | 3.44 to 58.274                                                |
| Index ranges                                  | $-20 \leq h \leq 22, -22 \leq k \leq 22, -8 \leq l \leq 22$   |
| Reflections collected                         | 18754                                                         |
| Independent reflections                       | 2127 [ $R_{\text{int}} = 0.0585, R_{\text{sigma}} = 0.0367$ ] |
| Data/restraints/parameters                    | 2127/0/42                                                     |
| Goodness-of-fit on $F^2$                      | 1.163                                                         |
| Final R indexes [ $I \geq 2\sigma(I)$ ]       | $R_1 = 0.0759, wR_2 = 0.1507$                                 |
| Final R indexes [all data]                    | $R_1 = 0.1277, wR_2 = 0.1725$                                 |
| Largest diff. peak/hole / $\text{e \AA}^{-3}$ | 0.90/-0.81                                                    |
| Flack parameter                               | -0.08(2)                                                      |

**Table S3: Crystal data and structure refinement for  $(C_{70})_{0.5}(C_{60})_{0.5}(SnI_4)_2$ .**

|                                               |                                                                    |
|-----------------------------------------------|--------------------------------------------------------------------|
| Empirical formula                             | $C_{65}I_8Sn_2$                                                    |
| Formula weight                                | 2033.23                                                            |
| Temperature/K                                 | 295.01                                                             |
| Crystal system                                | cubic                                                              |
| Space group                                   | $P4_32$                                                            |
| $a/\text{\AA}$                                | 16.8763(13)                                                        |
| Volume/ $\text{\AA}^3$                        | 4806.5(11)                                                         |
| Z                                             | 4                                                                  |
| $\rho_{\text{calc}}/\text{g/cm}^3$            | 2.810                                                              |
| $\mu/\text{mm}^{-1}$                          | 6.225                                                              |
| F(000)                                        | 3656.0                                                             |
| Crystal size/ $\text{mm}^3$                   | $0.421 \times 0.382 \times 0.303$                                  |
| Radiation                                     | $\text{MoK}\alpha$ ( $\lambda = 0.71073$ )                         |
| $2\theta$ range for data collection/ $^\circ$ | 3.412 to 57.394                                                    |
| Index ranges                                  | $-22 \leq h \leq 21$ , $-22 \leq k \leq 13$ , $-21 \leq l \leq 21$ |
| Reflections collected                         | 19074                                                              |
| Independent reflections                       | 2081 [ $R_{\text{int}} = 0.0387$ , $R_{\text{sigma}} = 0.0239$ ]   |
| Data/restraints/parameters                    | 2081/0/42                                                          |
| Goodness-of-fit on $F^2$                      | 1.188                                                              |
| Final R indexes [ $I \geq 2\sigma(I)$ ]       | $R_1 = 0.0794$ , $wR_2 = 0.1478$                                   |
| Final R indexes [all data]                    | $R_1 = 0.1241$ , $wR_2 = 0.1714$                                   |
| Largest diff. peak/hole / $e \text{\AA}^{-3}$ | 1.03/-1.13                                                         |
| Flack parameter                               | -0.10(2)                                                           |

**Table S4: Crystal data and structure refinement for (C<sub>70</sub>)<sub>0.75</sub>(C<sub>60</sub>)<sub>0.25</sub>(SnI<sub>4</sub>)<sub>2</sub>.**

|                                             |                                                               |
|---------------------------------------------|---------------------------------------------------------------|
| Empirical formula                           | C <sub>67.5</sub> I <sub>8</sub> Sn <sub>2</sub>              |
| Formula weight                              | 2063.25                                                       |
| Temperature/K                               | 295                                                           |
| Crystal system                              | cubic                                                         |
| Space group                                 | P4 <sub>3</sub> 32                                            |
| a/Å                                         | 17.0312(3)                                                    |
| Volume/Å <sup>3</sup>                       | 4940.1(3)                                                     |
| Z                                           | 4                                                             |
| ρ <sub>calc</sub> /cm <sup>3</sup>          | 2.774                                                         |
| μ/mm <sup>-1</sup>                          | 6.059                                                         |
| F(000)                                      | 3716.0                                                        |
| Crystal size/mm <sup>3</sup>                | 0.279 × 0.268 × 0.186                                         |
| Radiation                                   | MoKα (λ = 0.71073)                                            |
| 2Θ range for data collection/°              | 5.348 to 59.06                                                |
| Index ranges                                | -17 ≤ h ≤ 22, -23 ≤ k ≤ 23, -14 ≤ l ≤ 23                      |
| Reflections collected                       | 27967                                                         |
| Independent reflections                     | 2323 [R <sub>int</sub> = 0.0568, R <sub>sigma</sub> = 0.0223] |
| Data/restraints/parameters                  | 2323/0/32                                                     |
| Goodness-of-fit on F <sup>2</sup>           | 1.034                                                         |
| Final R indexes [I ≥ 2σ (I)]                | R <sub>1</sub> = 0.0580, wR <sub>2</sub> = 0.1532             |
| Final R indexes [all data]                  | R <sub>1</sub> = 0.0823, wR <sub>2</sub> = 0.1761             |
| Largest diff. peak/hole / e Å <sup>-3</sup> | 0.70/-0.79                                                    |
| Flack parameter                             | -0.06(3)                                                      |

## References

- (1) Coelho, A. A. TOPAS and TOPAS-Academic : an optimization program integrating computer algebra and crystallographic objects written in C++. *J. Appl. Crystallogr.* **2018**, *51*, 210–218.
- (2) Sheldrick, G. M. SHELXT – Integrated space-group and crystal-structure determination. *Acta Crystallogr. Sect. A Found. Adv.* **2015**, *71*, 3–8.
- (3) Sheldrick, G. M. Crystal structure refinement with SHELXL. *Acta Crystallogr. Sect. C Struct. Chem.* **2015**, *71*, 3–8.
- (4) Dolomanov, O. V.; Bourhis, L. J.; Gildea, R. J.; Howard, J. A. K.; Puschmann, H. OLEX2 : a complete structure solution, refinement and analysis program. *J. Appl. Crystallogr.* **2009**, *42*, 339–341.
- (5) Flack, H. D. On enantiomorph-polarity estimation. *Acta Crystallogr. Sect. A Found. Crystallogr.* **1983**, *39*, 876–881.
- (6) van Smaalen, S.; Petricek, V.; de Boer, J. L.; Dusek, M.; Verheijen, M. A.; Meijer, G. Low-temperature structure of solid C<sub>70</sub>. *Chem. Phys. Lett.* **1994**, *223*, 323–328.
- (7) Guzei, I. A. An idealized molecular geometry library for refinement of poorly behaved molecular fragments with constraints. *J. Appl. Crystallogr.* **2014**, *47*, 806–809.
- (8) Momma, K.; Izumi, F. VESTA 3 for three-dimensional visualization of crystal, volumetric and morphology data. *J. Appl. Crystallogr.* **2011**, *44*, 1272–1276.
